# Supplementary material
Source: ML conference proceedings conference paper supplement (https://proceedings.neurips.cc/paper_files/paper/2022/hash/127179162bfe4c422325ee7d05ad9cd8-Abstract.html)
Supplement: Supplementary file 1 [file 127179162bfe4c422325ee7d05ad9cd8-Supplemental-Conference.zip]

Archive with 86 entries (79 files):
- cpp/
- __MACOSX/._cpp
- cpp/LICENSE.md
- __MACOSX/cpp/._LICENSE.md
- cpp/CMakeLists.txt
- __MACOSX/cpp/._CMakeLists.txt
- cpp/.DS_Store
- __MACOSX/cpp/._.DS_Store
- cpp/test/
- __MACOSX/cpp/._test
- cpp/bin/
- __MACOSX/cpp/._bin
- cpp/python/
- __MACOSX/cpp/._python
- cpp/include/
- __MACOSX/cpp/._include
- cpp/README.md
- __MACOSX/cpp/._README.md
- cpp/CMakePresets.json
- __MACOSX/cpp/._CMakePresets.json
- cpp/.clang-format
- __MACOSX/cpp/._.clang-format
- cpp/src/
- __MACOSX/cpp/._src
- cpp/test/cached_gram_matrix.cpp
- __MACOSX/cpp/test/._cached_gram_matrix.cpp
- cpp/test/strategy.cpp
- __MACOSX/cpp/test/._strategy.cpp
- cpp/test/algorithm.cpp
- __MACOSX/cpp/test/._algorithm.cpp
- cpp/bin/wishart6000.cpp
- __MACOSX/cpp/bin/._wishart6000.cpp
- cpp/bin/exp.cpp
- __MACOSX/cpp/bin/._exp.cpp
- cpp/bin/offdiagonals.cpp
- __MACOSX/cpp/bin/._offdiagonals.cpp
- cpp/bin/double.cpp
- __MACOSX/cpp/bin/._double.cpp
- cpp/bin/product.cpp
- __MACOSX/cpp/bin/._product.cpp
- cpp/bin/gen_wishart.cpp
- __MACOSX/cpp/bin/._gen_wishart.cpp
- cpp/python/pre_process_MovieLens.ipynb
- __MACOSX/cpp/python/._pre_process_MovieLens.ipynb
- cpp/python/requirements.txt
- __MACOSX/cpp/python/._requirements.txt
- cpp/python/pre_process_Netflix.ipynb
- __MACOSX/cpp/python/._pre_process_Netflix.ipynb
- cpp/python/pre_process.py
- __MACOSX/cpp/python/._pre_process.py
- cpp/python/visualize.py
- __MACOSX/cpp/python/._visualize.py
- cpp/python/visualize.ipynb
- __MACOSX/cpp/python/._visualize.ipynb
- cpp/include/utility.hpp
- __MACOSX/cpp/include/._utility.hpp
- cpp/include/oracle.hpp
- __MACOSX/cpp/include/._oracle.hpp
- cpp/include/io.hpp
- __MACOSX/cpp/include/._io.hpp
- cpp/include/strategy.hpp
- __MACOSX/cpp/include/._strategy.hpp
- cpp/include/algorithm/
- __MACOSX/cpp/include/._algorithm
- cpp/include/timer.hpp
- __MACOSX/cpp/include/._timer.hpp
- cpp/include/cached_gram_matrix.hpp
- __MACOSX/cpp/include/._cached_gram_matrix.hpp
- cpp/src/io.cpp
- __MACOSX/cpp/src/._io.cpp
- cpp/include/algorithm/random_greedy.hpp
- __MACOSX/cpp/include/algorithm/._random_greedy.hpp
- cpp/include/algorithm/param.hpp
- __MACOSX/cpp/include/algorithm/._param.hpp
- cpp/include/algorithm/result.hpp
- __MACOSX/cpp/include/algorithm/._result.hpp
- cpp/include/algorithm/double_greedy.hpp
- __MACOSX/cpp/include/algorithm/._double_greedy.hpp
- cpp/include/algorithm/greedy.hpp
- __MACOSX/cpp/include/algorithm/._greedy.hpp
- cpp/include/algorithm/interlace_greedy.hpp
- __MACOSX/cpp/include/algorithm/._interlace_greedy.hpp
- cpp/include/algorithm/stochastic_greedy.hpp
- __MACOSX/cpp/include/algorithm/._stochastic_greedy.hpp
- full_version.pdf
- __MACOSX/._full_version.pdf
