# Supplementary material
Source: ML conference proceedings conference paper supplement (https://proceedings.neurips.cc/paper_files/paper/2022/hash/127179162bfe4c422325ee7d05ad9cd8-Abstract.html)
Supplement: Supplementary file 1 [file 127179162bfe4c422325ee7d05ad9cd8-Supplemental-Conference.zip › cpp/CMakeLists.txt]

cmake_minimum_required(VERSION 3.23)

# set(CMAKE_TOOLCHAIN_FILE
#    ${CMAKE_CURRENT_SOURCE_DIR}/../vcpkg/scripts/buildsystems/vcpkg.cmake
#    CACHE STRING "Vcpkg toolchain file"
# )

project(lazydpp
    VERSION 1.0
    DESCRIPTION "The official implementation of \"Lazy and Fast Greedy MAP Inference for Determinantal Point Process\""
#    HOMEPAGE_URL "https://github.com/"
    LANGUAGES CXX
)

find_package(Boost 1.78 REQUIRED program_options)
find_package(Eigen3 3.4 CONFIG REQUIRED)
if(ENABLE_OPENMP)
  find_package(OpenMP REQUIRED)
endif()

add_library(${PROJECT_NAME}
    src/io.cpp
)
target_include_directories(${PROJECT_NAME} PUBLIC include)
target_compile_features(${PROJECT_NAME} PUBLIC cxx_std_17)
target_compile_options(${PROJECT_NAME} PUBLIC -Wall -Wextra -Wpedantic -g -fdiagnostics-color $<$<BOOL:${ENABLE_OPENMP}>:-Xpreprocessor -fopenmp>)
target_link_libraries(${PROJECT_NAME} PUBLIC
    Boost::headers
    Boost::program_options
    Eigen3::Eigen
    $<$<BOOL:${ENABLE_OPENMP}>:OpenMP::OpenMP_CXX>
)


# bin settings
add_executable(exp bin/exp.cpp)
target_link_libraries(exp ${PROJECT_NAME})

add_executable(double bin/double.cpp)
target_link_libraries(double ${PROJECT_NAME})

add_executable(gen_wishart bin/gen_wishart.cpp)
target_link_libraries(gen_wishart ${PROJECT_NAME})

add_executable(product bin/product.cpp)
target_link_libraries(product ${PROJECT_NAME})

add_executable(offdiagonals bin/offdiagonals.cpp)
target_link_libraries(offdiagonals ${PROJECT_NAME})

add_executable(wishart6000 bin/wishart6000.cpp)
target_link_libraries(wishart6000 ${PROJECT_NAME})

# test settings
enable_testing()
find_package(GTest 1.11 CONFIG REQUIRED)

add_executable(${PROJECT_NAME}-test
   test/cached_gram_matrix.cpp
   test/strategy.cpp
   test/algorithm.cpp
)

target_link_libraries(${PROJECT_NAME}-test
    ${PROJECT_NAME}
    GTest::gtest
    GTest::gtest_main
)

set_target_properties(${PROJECT_NAME}-test PROPERTIES OUTPUT_NAME runtest)

include(GoogleTest)
gtest_discover_tests(${PROJECT_NAME}-test)
