# Supplementary material
Source: ML conference proceedings conference paper supplement (https://proceedings.neurips.cc/paper_files/paper/2022/hash/127179162bfe4c422325ee7d05ad9cd8-Abstract.html)
Supplement: Supplementary file 1 [file 127179162bfe4c422325ee7d05ad9cd8-Supplemental-Conference.zip › cpp/CMakePresets.json]

{
    "version": 3,
    "cmakeMinimumRequired": {
        "major": 3,
        "minor": 23
    },
    "configurePresets": [
        {
            "name": "default",
            "binaryDir": "${sourceDir}/build",
            "cacheVariables": {
                "CMAKE_EXPORT_COMPILE_COMMANDS": "ON"
            }
        },
        {
            "name": "make",
            "inherits": "default",
            "cacheVariables": {
                "CMAKE_BUILD_TYPE": "Release"
            }
        },
        {
            "name": "ninja",
            "inherits": "default",
            "generator": "Ninja Multi-Config",
            "cacheVariables": {
                "CMAKE_TOOLCHAIN_FILE": {
                    "value": "${sourceDir}/../vcpkg/scripts/buildsystems/vcpkg.cmake",
                    "type": "FILEPATH"
                }
            }
        }
    ],
    "buildPresets": [
        {
            "name": "debug",
            "configurePreset": "default",
            "configuration": "Debug"
        },
        {
            "name": "release",
            "configurePreset": "default",
            "configuration": "Release"
        }
    ],
    "testPresets": [
        {
            "name": "default",
            "configurePreset": "default",
            "output": {
                "outputOnFailure": true
            },
            "environment": {
                "GTEST_COLOR": "1"
            }
        },
        {
            "name": "debug",
            "inherits": "default",
            "configuration": "Debug"
        },
        {
            "name": "release",
            "inherits": "default",
            "configuration": "Release"
        }
    ]
}
