# Supplementary material
Source: ML conference proceedings conference paper supplement (https://proceedings.neurips.cc/paper_files/paper/2022/hash/127179162bfe4c422325ee7d05ad9cd8-Abstract.html)
Supplement: Supplementary file 1 [file 127179162bfe4c422325ee7d05ad9cd8-Supplemental-Conference.zip › cpp/include/algorithm/param.hpp]

#ifndef PARAM_HPP
#define PARAM_HPP

#include <limits>

struct Param
{
    double time_limit                = std::numeric_limits<double>::infinity();
    std::uint_fast32_t seed          = 0;
    bool log_computed_offdiagonals_V = false;
};

#endif
