# Supplementary material
Source: ML conference proceedings conference paper supplement (https://proceedings.neurips.cc/paper_files/paper/2022/hash/127179162bfe4c422325ee7d05ad9cd8-Abstract.html)
Supplement: Supplementary file 1 [file 127179162bfe4c422325ee7d05ad9cd8-Supplemental-Conference.zip › cpp/python/pre_process_MovieLens.ipynb]

# %% [code]
! wget -P ../data https://files.grouplens.org/datasets/movielens/ml-25m.zip
! unzip ../data/ml-25m.zip -d ../data

# %% [code]
import pandas as pd
import numpy as np

# %% [code]
# exclude column 'timestamp' and smaller rates than 4
df = pd.read_csv('../data/ml-25m/ratings.csv').drop('timestamp', axis=1)
df['rating'] = df['rating'].map(lambda x: 1 if x >= 4 else 0)
df = df[df.rating > 0]

# %% [code]
# construct a dictionary for reassigning movie id
movie_list  = np.sort(df['movieId'].unique())
movie_dic = {}
for i, movie_id in enumerate(movie_list):
    movie_dic[movie_id] = i

# construct a dictionary for reassigning user id
user_list  = np.sort(df['userId'].unique())
user_dic = {}
for i, user_id in enumerate(user_list):
    user_dic[user_id] = i
  
df['movieId'] = df['movieId'].map(lambda org_id: movie_dic[org_id])
df['userId'] = df['userId'].map(lambda org_id: user_dic[org_id])
df = df[['movieId','userId']].sort_values(['movieId','userId'])

# %% [code]
# output csv
d = len(user_dic)
n = len(movie_dic)
nnz = len(df)

with open('../data/movie_lens/B.txt', 'w') as f:
    f.write(str(n)+" " + str(d)+ " " +str(nnz)+"\n")
    for row in df.itertuples(name=None):
        i, m, u = row
        f.write(str(m)+" ")
        f.write(str(u)+"\n")
