# Supplementary material
Source: ML conference proceedings conference paper supplement (https://proceedings.neurips.cc/paper_files/paper/2022/hash/127179162bfe4c422325ee7d05ad9cd8-Abstract.html)
Supplement: Supplementary file 1 [file 127179162bfe4c422325ee7d05ad9cd8-Supplemental-Conference.zip › cpp/python/pre_process_Netflix.ipynb]

# %% [markdown]
Download data from [Netflix Prize](https://www.kaggle.com/datasets/netflix-inc/netflix-prize-data) and put it to `data/netflix_raw` directory

# %% [code]
import glob
import pandas as pd
import numpy as np

# %% [code]
movie_id = -1
userId_list = []
movieId_list = []

for path in sorted(glob.glob('../data/netflix_raw/combined*.txt')):
    with open(path) as f:
        for l in f.readlines():
            # l = "key:" or s = "movie_id, rate, timestamp"
            key, *u = l.split(',')
            if u:
                if float(u[0]) >= 4:
                    movieId_list.append(movie_id)
                    userId_list.append(int(key))
            else:
                movie_id += 1

df = pd.DataFrame([])
df['movieId'] = movieId_list
df['userId'] = userId_list

# %% [code]
# reassign user id
user_list  = np.sort(df['userId'].unique())
user_dic = {}
for i, user_id in enumerate(user_list):
    user_dic[user_id] = i

df['userId'] = df['userId'].map(lambda org_id: user_dic[org_id])
df = df[['movieId','userId']].sort_values(['movieId','userId'])

# %% [code]
d = len(user_dic)
n = len(df['movieId'].unique())
nnz = len(df)

with open('../data/netflix/B.txt', 'w') as f:
    f.write(str(n)+" " + str(d)+ " " +str(nnz)+"\n")
    for row in df.itertuples(name=None):
        i, m, u = row
        f.write(str(m)+" ")
        f.write(str(u)+"\n")
