# Supplementary material
Source: ML conference proceedings conference paper supplement (https://proceedings.neurips.cc/paper_files/paper/2022/hash/127179162bfe4c422325ee7d05ad9cd8-Abstract.html)
Supplement: Supplementary file 1 [file 127179162bfe4c422325ee7d05ad9cd8-Supplemental-Conference.zip › cpp/python/requirements.txt]

cycler==0.11.0
fonttools==4.33.3
kiwisolver==1.4.2
matplotlib==3.5.2
numpy==1.22.4
packaging==21.3
pandas==1.4.2
Pillow==9.1.1
pyparsing==3.0.9
python-dateutil==2.8.2
pytz==2022.1
scipy==1.8.1
seaborn==0.11.2
six==1.16.0
