# Supplementary material
Source: ML conference proceedings conference paper supplement (https://proceedings.neurips.cc/paper_files/paper/2022/hash/127179162bfe4c422325ee7d05ad9cd8-Abstract.html)
Supplement: Supplementary file 1 [file 127179162bfe4c422325ee7d05ad9cd8-Supplemental-Conference.zip › cpp/python/visualize.ipynb]

# %% [code]
import glob
import matplotlib.pyplot as plt
import os
import pandas as pd
import seaborn as sns
sns.set_theme(style="white")

# %% [code]
def parse_csv(path_pattern, labels):
    df = pd.DataFrame()
    path_list_ML = glob.glob(path_pattern)
    path_list_ML.sort()
    for path, label in zip(path_list_ML, labels):
        df_cur = pd.read_csv(path)
        df_cur['alg'] = label
        df = pd.concat([df, df_cur], axis=0)
    df.index = range(len(df))
    return df


# %% [code]
labels = ['LazyFast', 'Lazy', 'Fast', 'Naive']
path_to_data = '#../result/'
path_to_out = 'graph/'
alg = 'greedy'
dataset_name = 'movie_len'
input_matrix = 'B'
x_axis = 'k'
y_axis = 'time'

path_pattern = f'{path_to_data}{alg}/{dataset_name}/*-{input_matrix}*.csv'
df = parse_csv(path_pattern, labels)
fig = plt.figure()
graph = sns.lineplot(data=df, x=x_axis, y=y_axis, style='alg', hue='alg', palette='tab10')
graph.legend()

os.makedirs(path_to_out, exist_ok=True)
fig.savefig(
    f'{path_to_out}{alg}_{dataset_name}_{y_axis}_{input_matrix}.pdf')
